# Supplementary material
Source: publisher figshare collection journal article supplement (https://karger.figshare.com/ndownloader/files/26375410)

**Supplementary Figure 1.**


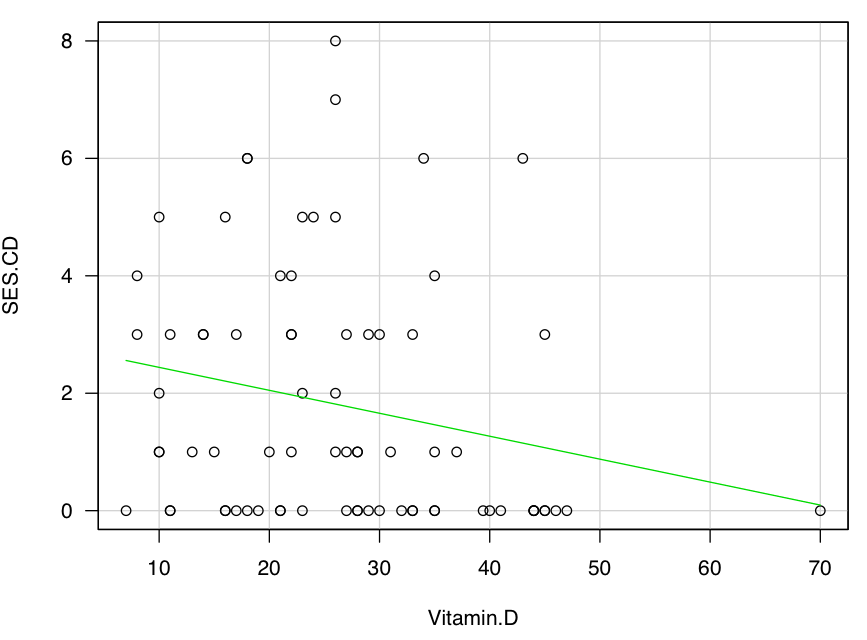


A scatter plot of vitamin D and SES-CD score

Supplement: Supplementary file 1 [file 26375410]
